# Supplementary material
Source: PubMed Central journal article supplement (PMC240727)
Supplement: pnas_2132286100_5.pdf [file pnas_2132286100_5.pdf]

**Table 2. Haseman-Elston regression method analysis for 6 chromosomal regions**

| <b>Chromosome</b> | <b>Location,<br/>cM</b> | <b>No. sib pairs</b> | <b>Beta</b> | <b>SE</b> | <b><i>P</i> value</b> |
|-------------------|-------------------------|----------------------|-------------|-----------|-----------------------|
| 1                 | 164 cM                  | 187                  | 0.0930      | 0.0572    | 0.0529                |
| 6                 | 119 cM                  | 187                  | 0.0305      | 0.0601    | 0.3064                |
| 6                 | 146 cM                  | 187                  | 0.1474      | 0.0581    | 0.0059                |
| 9                 | 95 cM                   | 187                  | 0.1813      | 0.0547    | 0.0006                |
| 10                | 0 cM                    | 187                  | 0.1254      | 0.0638    | 0.0254                |
| 16                | 60 cM                   | 187                  | 0.0208      | 0.0609    | 0.3668                |
