# Supplementary material
Source: PubMed Central journal article supplement (PMC240727)
Supplement: pnas_2132286100_6.pdf [file pnas_2132286100_6.pdf]

**Table 3. Haseman-Elston linkage analyses**

| <b>Chromosome</b> | <b>Location,<br/>cM</b> | <b>Marker allele<br/>frequencies</b> | <b>Beta</b> | <b>Beta<br/>SE</b> | <b><i>P</i> value</b> |
|-------------------|-------------------------|--------------------------------------|-------------|--------------------|-----------------------|
| 9                 | 95                      | Maximum likelihood                   | 0.1813      | 0.0547             | 0.0006                |
| 9                 | 95                      | Equal                                | 0.1933      | 0.0554             | 0.0003                |
| 9                 | 95                      | Complement                           | 0.1943      | 0.0552             | 0.0003                |

Here we demonstrate calculations of the *P* value for linkage on chromosome 9 at 95 cM by using the Haseman-Elston method and employing the maximum likelihood estimate of marker allele frequencies (row 1), compared to setting all marker allele frequencies equal (row 2), and compared to setting all marker allele frequencies proportional to [1– (maximum likelihood estimate)] (row 3). Beta is the coefficient of regression on the allele sharing estimate.
