# Supplementary material
Source: PubMed Central journal article supplement (PMC240727)

◆ Colon Cancer

◇ Colon Adenoma > 1cm or with high grade dysplasia

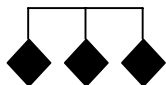

1

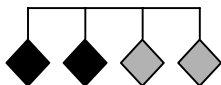

1

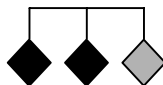

4

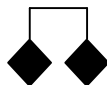

4

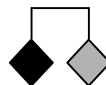

26

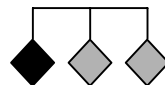

1

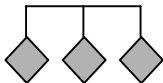

2

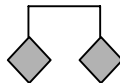

14

Supplement: pnas_2132286100_2.pdf [file pnas_2132286100_2.pdf]

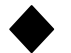

Colon Cancer

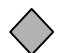

Colon Adenoma > 1cm or with high grade dysplasia

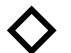

Unaffected by endoscopy

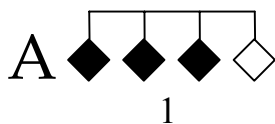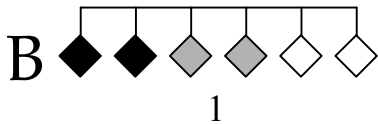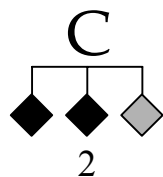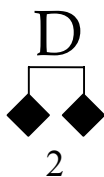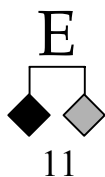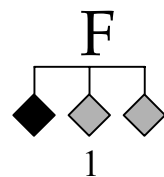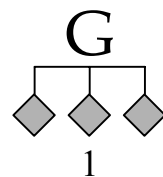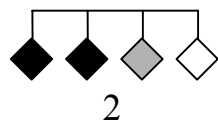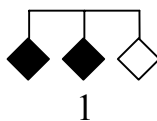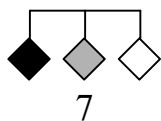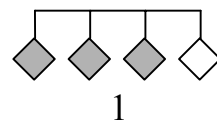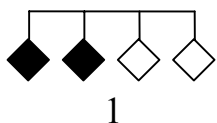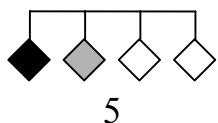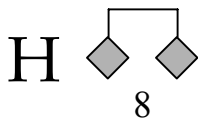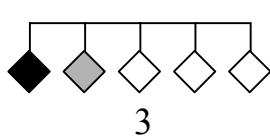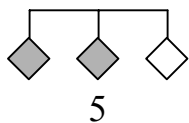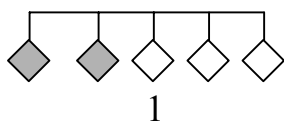

Supplement: pnas_2132286100_4.pdf [file pnas_2132286100_4.pdf]
